# Supplementary material for: Mammalian Cell Interaction with Periodic Surface Nanostructures
Source: MDPI journal article supplement (doi:10.3390/ijms23094676), 2022-04-23
Supplement: s1 [file s1]

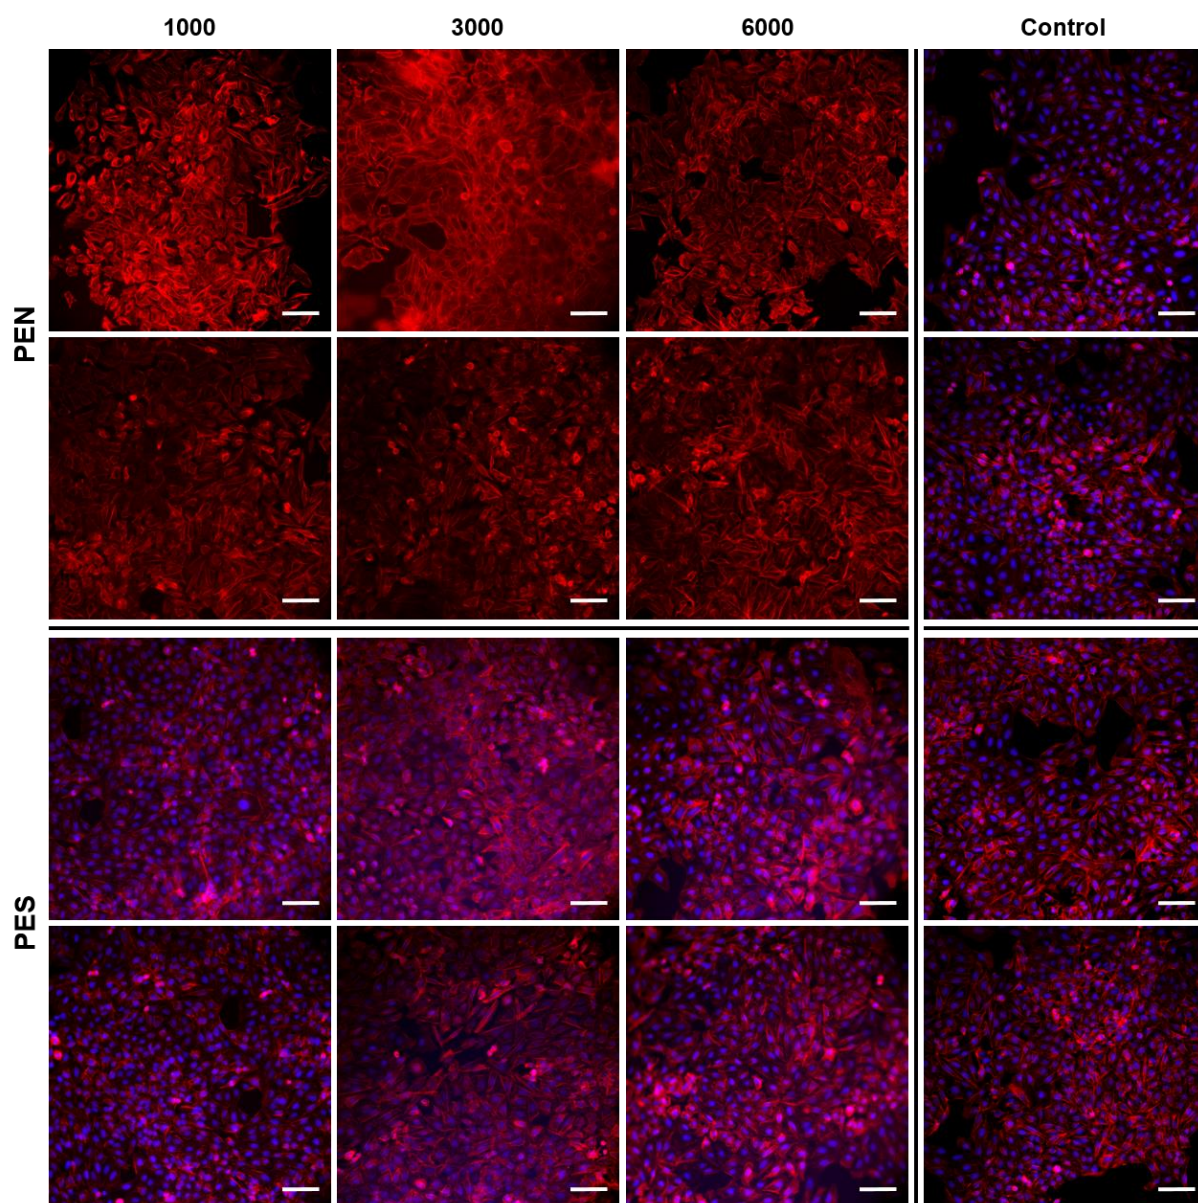

**Figure S1.** Fluorescence microscopy images of U-2 OS cells (human cells derived from osteosarcoma) growing on laser-treated PEN and PES with the fluence of  $10 \text{ mJ}\cdot\text{cm}^{-2}$  and 1,000, 3,000, and 6,000 pulses. The photos were acquired 72 h post-seeding. As a control, tissue culture polystyrene (TCPS), was used. The white line represents  $80 \mu\text{m}$ .
